# Supplementary material for: The RAD52-like protein ODB1 is required for the efficient excision of two mitochondrial introns spliced via first-step hydrolysis
Source: PubMed Central journal article supplement (PMC4513849; doi:10.1093/nar/gkv540), 2015-06-05
Supplement: supp_gkv540_nar-00175-a-2015-File007.pdf [file supp_gkv540_nar-00175-a-2015-File007.pdf]

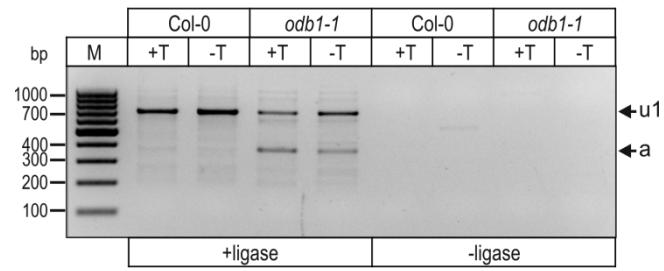

**Supplementary Figure S1.** Amplification of cRT-PCR products a and u1 as shown in Figure 1C depends on ligase treatment of transcripts. cRT-PCR assays were performed as in Figure 1C, except that control experiments were simultaneously performed in which no T4 RNA ligase was added during the ligation step (- ligase lanes). See Figure 1 legend for further details.

**A**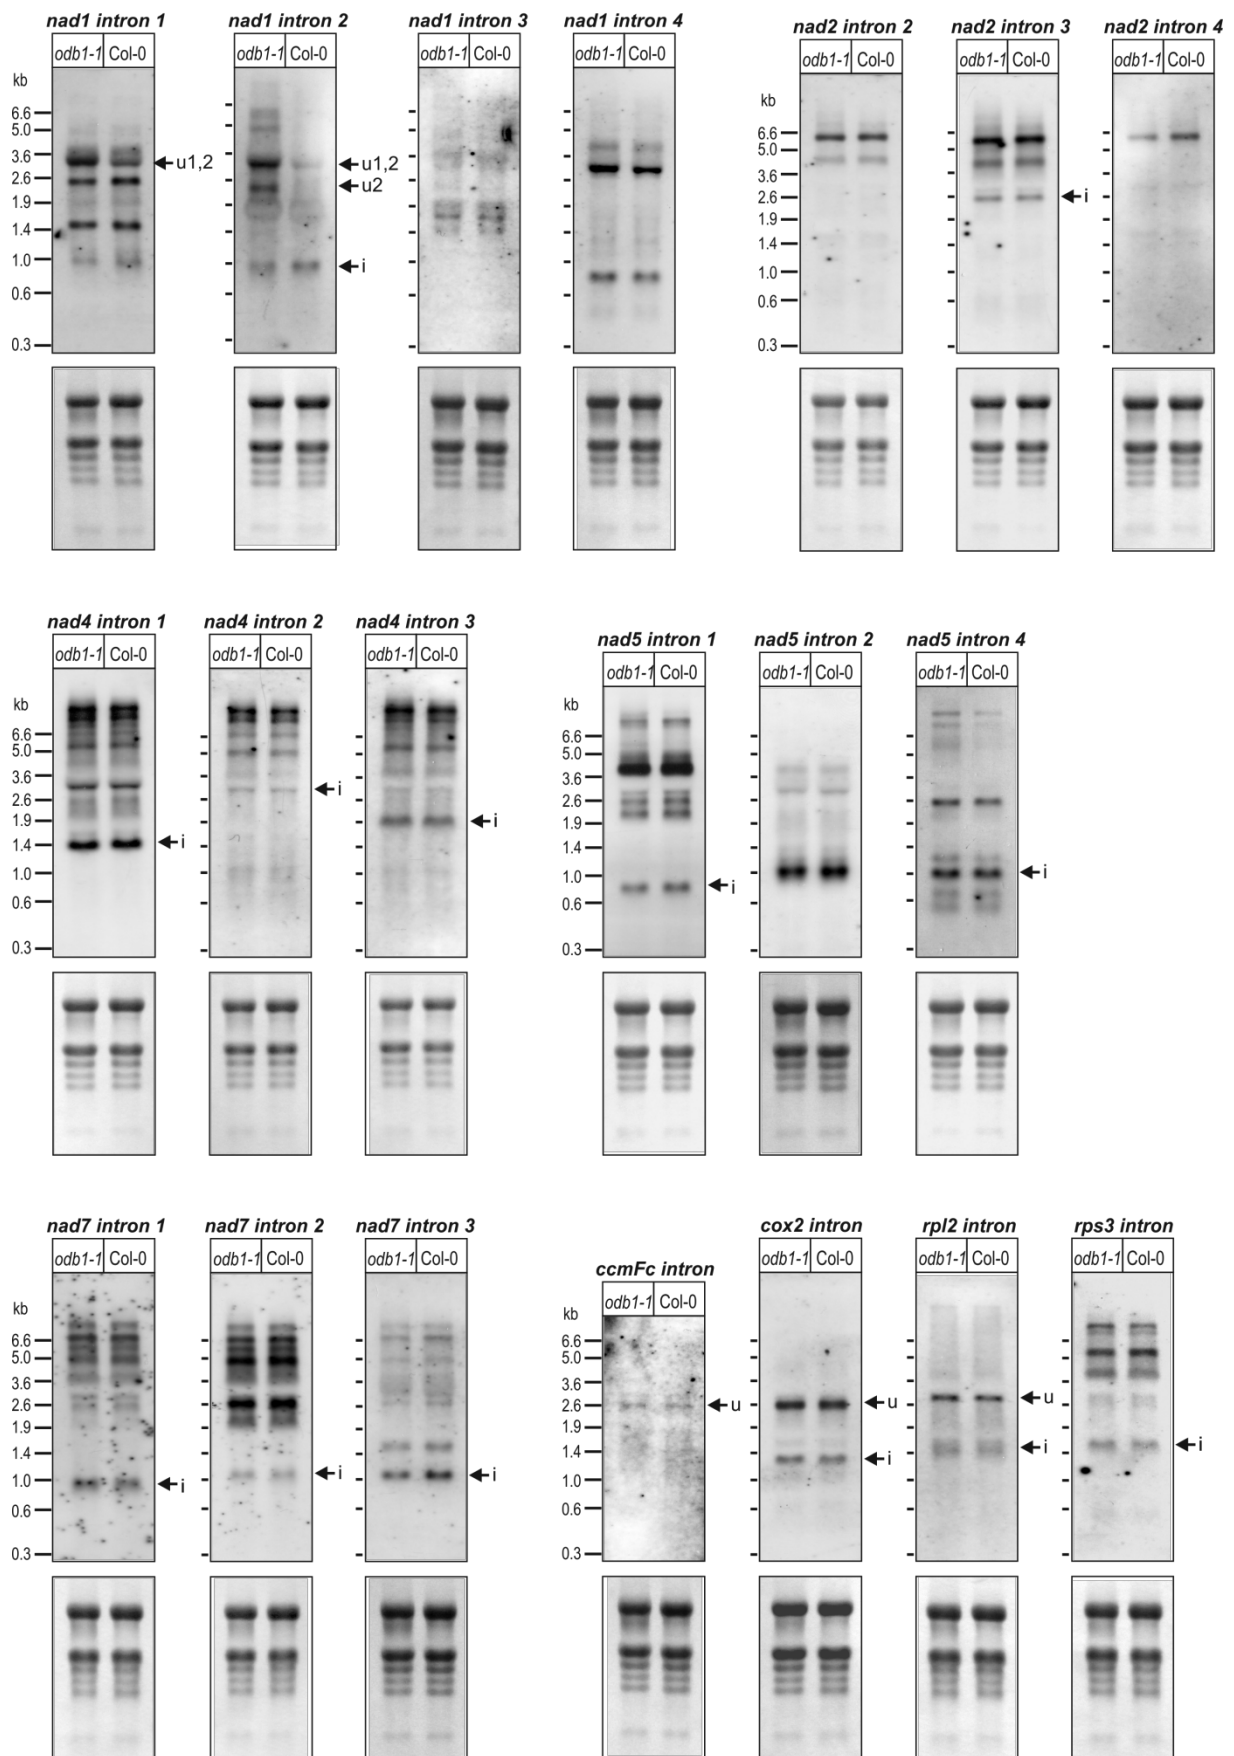

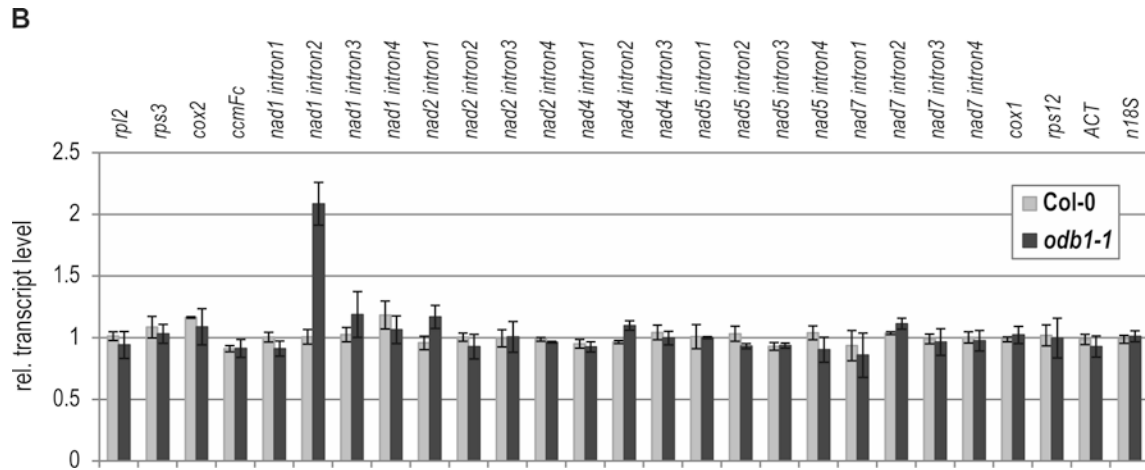

**Supplementary Figure S2.** The splicing of introns other than *nad2* intron 1 and *nad1* intron 2 is not affected by *ODB1* inactivation. (A) To assay the *odb1-1* mutant for over-accumulating unspliced mitochondrial transcripts, probes for 20 out of the 23 mitochondrial introns were hybridised to filter-immobilised total RNA isolated from *odb1-1* and wild-type (Col-0) seedlings (top panels). RNA marker sizes are indicated. Selected transcripts are marked that were inferred from their sizes as being released introns (i) or unspliced transcripts (u); see Figure 2 for *nad1* transcript labels. The methylene blue-stained filters are shown as a loading control in the bottom panels. Blots for *nad5* intron 3 and *nad7* intron 4, for which no signals were detected, are not displayed; hybridisations with *nad2* intron 1 probes are shown in Figure 1. (B) Transcripts that are unspliced for a specific intron were measured by qRT-PCR, using primer pairs amplifying across intron-exon borders. Median-normalised relative transcripts levels and standard errors are shown. Intron-free mitochondrial transcripts *cox1* and *rps12* and nuclear transcripts *ACT* and *18S* were included as controls. Surprisingly, over-accumulation of transcripts retaining *nad2* intron 1 in *odb1-1* is not apparent from this analysis.

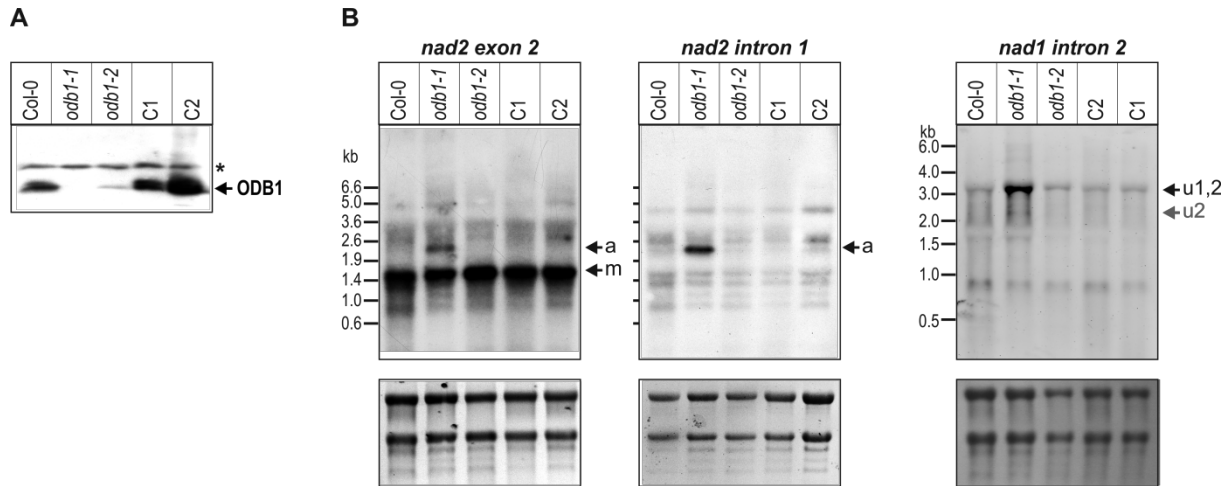

**Supplementary Figure S3.** Complementation of *odb1-1* mutants with a functional *ODB1* gene copy restores wild type-like splicing of *nad1* and *nad2* transcripts. **(A)** An *ODB1* antibody (37) was used to probe immunoblots of leaf extracts prepared from wild-type, *odb1-1*, *odb1-2* plants and two independent complemented plant lines (C1, C2). Signals corresponding to *ODB1* are indicated; a signal marked with an asterisk might be due to a cross-reaction of the antibody with chloroplastic *ODB2*. The complemented lines show wild type-like or higher levels of *ODB1*. **(B)** Probes for *nad2* exon 2 and intron 1 and for *nad1* intron 2 were hybridised to filter-immobilised total RNA isolated from *odb1-1*, *odb1-2* and wild-type (Col-0) flowers and from flowers of complemented lines C1 and C2 (top panels). RNA marker sizes are indicated. Hybridisation signals are labelled as in Figures 1 and 2. The complemented lines C1 and C2 displayed wild type-like transcript patterns, substantiating that the splicing defects seen in *odb1-1* were due to *ODB1* loss. The methylene blue-stained filters are shown as a loading control in the bottom panels. The *nad1* intron 2 blot shown here does not indicate elevated unspliced transcripts in *odb1-2*; this is likely because less RNA was loaded for the *odb1-2* sample.

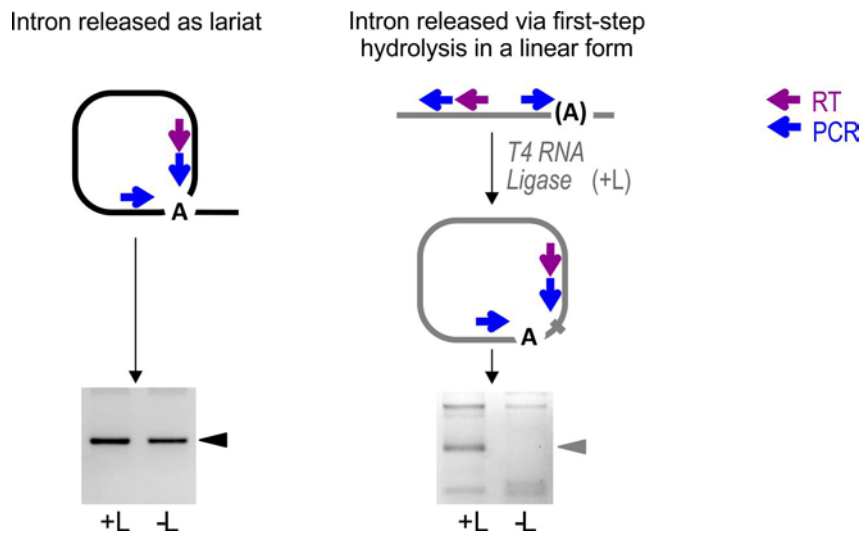

**Supplementary Figure S4.** Schematic illustrating the RT-PCR/cRT-PCR strategy applied to amplify branch-point regions and/or intron extremities in order to distinguish introns released via first-step hydrolysis (right) from those liberated as lariats (left). Positioning of primers used for reverse transcription (violet) and subsequent PCR (blue) is indicated. The method exploits the ability of reverse transcriptases to read across lariat branch points (45). Introns spliced via a hydrolytic pathway and released in a linear form (right) require head-to-tail ligation in order to yield PCR products. Sequences obtained for cDNAs made from these introns will contain the complete intron 3' sequence whereas sequences of lariat-derived cDNAs will lack nucleotides corresponding to the lariat tail. Sequences including the lariat tail but derived from introns that do not require ligation prior to amplification correspond to introns released via first-step hydrolysis that are subsequently circularised or to introns released in a circular form. Excised circular introns have been previously observed in maize mitochondria (34). Sequences of lariat-derived cDNAs will show a thymidine instead of an adenosine at the branch point (45).

**Supplementary Table S1.** Primers used for synthesizing DIG-labelled probes.

| <b>Probe</b>         | <b>Primer 1</b>            | <b>Primer 2</b>           |
|----------------------|----------------------------|---------------------------|
| <i>nad2</i> exon 1   | CATTTTTTTTATTGAGCCGAATCACT | TCCAAGCCAACCCACATTACTG    |
| <i>nad2</i> exon 2   | CGGGCTTTCCTGAGGTATCTAA     | GTAGTTGTCCGGTCGTACC       |
| <i>nad2</i> exon 4   | CCGGTTACAGCATTCTTTTC       | AGCGGCGAAGAACAATAGA       |
| <i>nad2</i> intron 1 | GGTGAGGAATATCCCAGTCTC      | CACACGTGCAAGTTTCCCTG      |
| <i>nad2</i> intron 2 | AGTTAGAGAGGTTGGCGAACTACT   | AAAGTACCTCTCCAATCCTCGAT   |
| <i>nad2</i> intron 3 | GTTCTGATAAGGAAGGAACAACCC   | TCTCTTTTCTAGTAGATGCCGAACC |
| <i>nad2</i> intron 4 | GGCAGAGGGTCCGTAGTAC        | GATCAAAAAGGAAGTTTACTGGC   |
| <i>nad1</i> exon 1   | CGTTCATTGAGAATAGATGG       | CGAGCGACCAGACTTAACAT      |
| <i>nad1</i> exon 2-3 | GCTCGTACGGTTCATAGAAG       | ACATTATAGCCTGCAACTGA      |
| <i>nad1</i> exon 5   | CCATGCACATGTCTTTTCCA       | AAGGAAGCCATTGAAAGGTGACTA  |
| <i>nad1</i> intron 1 | TGATTTTTTTGGCGGGTTC        | GTTCAAGTTACCAACAATCAACGAG |
| <i>nad1</i> intron 2 | AAACCAGGGCAACAAATGTCG      | AATGTGGCTCGTCCGTGCT       |
| <i>nad1</i> intron 3 | CCCTGGATTCCCGGATTC         | CAAGGCCATTTCTGTCCACC      |
| <i>nad1</i> intron 4 | CGCTTGACTTGTCACCTTCGT      | GATGCAGCTCCGTGGACC        |
| <i>nad4</i> intron 1 | GTAGAGGATCGACCCGTTCACTAG   | TGGAGTTCGGCCTGTAGAGC      |
| <i>nad4</i> intron 2 | CTCTTATTTGTCAGCCGTGAGG     | AGATTTCTCCCGGAGTACGC      |
| <i>nad4</i> intron 3 | GATGGACGTTGCACATGAC        | ACCGGATATCAAACCATAAGG     |
| <i>nad5</i> intron 1 | CCCTTTTCTTGATCCAGCCT       | AGTCAGAAGTGAATTACGAGTCGG  |
| <i>nad5</i> intron 2 | CCGAATGGAGGGAGACGTT        | TGGAAAGGCTCGGCTTCA        |
| <i>nad5</i> intron 4 | GCCTTCTTTCGTCCGTCCAC       | CGGAAAGGCTGCTATACCATACC   |
| <i>nad7</i> intron 1 | GCTCCTATGCCGTAGCTATG       | GACAGCAGGCGGGTTACAC       |
| <i>nad7</i> intron 2 | GATCGCGGAGTCACTGAATG       | GTTCCACCGAATGCTCCTATC     |
| <i>nad7</i> intron 3 | TGATGGAACATGGTAAGCCTATCT   | CGCAACAGCAGGAACTATGAC     |
| <i>rps3</i> intron   | CAGCGCGGGTAGCCTACTTAG      | CGTTCGGTTCGGATAAGTCAAG    |
| <i>cox2</i> intron   | GTTTAGAGGCCTTATAGTAGCA     | TCACGTCAGTACCTCTCAGAA     |
| <i>ccmFc</i> intron  | TGCTCAGTTGACTCCTTAACC      | TGGTCAAAGACTTGGTTGG       |
| <i>rpl2</i> intron   | AGAGAGGCCAGGCAATGAC        | CTACAAGAAGGAAAGCTTAGCGAG  |

**Supplementary Table S2.** Primers used for quantitative RT-PCR analysis.

| Gene or intron                    | Spliced transcript          |                             | Unspliced transcript        |                             |
|-----------------------------------|-----------------------------|-----------------------------|-----------------------------|-----------------------------|
|                                   | Primer 1                    | Primer 2                    | Primer 1                    | Primer 2                    |
| <i>rpl2</i> intron                | CCGAAGACGGATCAAGGTAA        | CGCAATTCATCACCATTTTG        | TTAGGAAGAGCCGTACGAGG        | CGCAATTCATCACCATTTTG        |
| <i>rps3</i> intron                | AGCCGAAGGTGAGTCTCGTA        | CCGATTTGCGTAAGACTTGG        | AGCCGAAGGTGAGTCTCGTA        | TCTACGGCGGGTCACTAT          |
| <i>cox2</i> intron                | TGGGGGATTAATTGATTGGA        | TGATGCTGTACCTGGTCGTT        | TGGGGGATTAATTGATTGGA        | AGCAGTACGAGCTGAAAGGC        |
| <i>ccmFc</i> intron               | GTGGGTCCATGTAAATGATCG       | CACATGGAGGAGTGTGCATC        | CCCGGATCGAATCAGAGTT         | CACATGGAGGAGTGTGCATC        |
| <i>nad1</i> intron 1              | GACCAATAGATACTTCATAAGAGACCA | TTGCCATATCTTCGCTAGGTG       | GACCAATAGATACTTCATAAGAGACCA | CGTGTCTGTACGGTTCATAG        |
| <i>nad1</i> intron 2              | ATTCAGCTTCCGCTTCTGG         | TCTGCAGCTCAAATGGTCTC        | GGTTGGGTTAGGGGAACATC        | TCTGCAGCTCAAATGGTCTC        |
| <i>nad1</i> intron 3              | AAAAGAGCAGACCCCATTTGA       | TCCGTTTGTATCTCCAGAAG        | AAAAGAGCAGACCCCATTTGA       | GGGAGCTGTATGAGCGGTAA        |
| <i>nad1</i> intron 4              | AGCCCGGGATCTTCTTGA          | TCTTCAATGGGGTCTGCTC         | AGCCCGGGATCTTCTTGA          | ACGGAGCTGCATCCCTACT         |
| <i>nad2</i> intron 1              | GCGAGCAGAAGCAAGGTTAT        | GGATCCTCCCACACATGTTT        | GCGAGCAGAAGCAAGGTTAT        | CCCATTCTTAACCAAGTGGAG       |
| <i>nad2</i> intron 2              | AAAGGAAGTGCAGTGTCTTGA       | AATATTTGATCTTAGGTGCATTTTC   | TGTGGTGGTTGGGCCTAC          | AAAGGAAGTGCAGTGTCTTGA       |
| <i>nad2</i> intron 3              | GCGCAATAGAAAGGAATGCT        | CTATGGGTCTACTGGAGCTACCC     | GCGCAATAGAAAGGAATGCT        | GGCGAATTTCAAACCTGTGG        |
| <i>nad2</i> intron 4              | CAAAGGAGAGGGGTATAGCAA       | TATTTGTTCTTCGCCGCTTT        | CTTATTCGTGGCAACCTTCC        | TATTTGTTCTTCGCCGCTTT        |
| <i>nad4</i> intron 1              | ATTCTATGTTTTTCCCGAAAGC      | GAAAACTGATATGCTGCCTTG       | CCGTATGATGCGGAAGTCTC        | GAAAACTGATATGCTGCCTTG       |
| <i>nad4</i> intron 2              | AATACCCATGTTTTCCCGAAG       | TGCTACCTCCAATTCCTGT         | GCGGAACGACCAGAAAAATA        | TGCTACCTCCAATTCCTGT         |
| <i>nad4</i> intron 3              | TTCTCCATAAATCTCCGATT        | TGAAATTTGCCATGTTGCAC        | TCTAGCTTGGTTCCGAGAGC        | TGAAATTTGCCATGTTGCAC        |
| <i>nad5</i> intron 1              | TGGACCAAGCTACTTATGGATG      | CCATGGATCTCATCGGAAAT        | TGGACCAAGCTACTTATGGATG      | TTCGCAAATAGGTCCGACT         |
| <i>nad5</i> intron 2              | AACTCGGATTCGGCAAGAA         | CTGGCTCTCGGGAGTCTCTT        | GTACGATCGTGTGGGTGA          | CTGGCTCTCGGGAGTCTCTT        |
| <i>nad5</i> intron 3              | AACTCGGATTCGGCAAGAA         | CTGGCTCTCGGGAGTCTCTT        | AACTCGGATTCGGCAAGAA         | GCCGTGTAATAGGCGACCA         |
| <i>nad5</i> intron 4              | AACATTGCAAAGGCATAATGA       | GTTCTGCGTTTCGGATATG         | AACATTGCAAAGGCATAATGA       | CCTGTAAACCCCATGATGT         |
| <i>nad7</i> intron 1              | ACCTCAACATCCTGCTGCTC        | AAGGTAAAGCTTGAAGATAAGTTTTGT | ACGGTTTTTAGGGGATCTG         | AAGGTAAAGCTTGAAGATAAGTTTTGT |
| <i>nad7</i> intron 2              | GAGGGACTGAGAAATTAATAGAGTACA | TGGTACCTCGCAATCAAAA         | AGTGGGAGAGCCGTGTTATG        | TGGTACCTCGCAATCAAAA         |
| <i>nad7</i> intron 3              | ACTGTCACTGCACAGCAAGC        | CATTGCACAATGATCCGAAG        | TAAAGTGAAGTGGTGGGCCT        | CATTGCACAATGATCCGAAG        |
| <i>nad7</i> intron 4              | GATCAAAGCCGATGATCGTAA       | AGGTGCTTCAACTGCGGTAT        | CGCCAAATGACTACAGGAT         | AGGTGCTTCAACTGCGGTAT        |
| <i>cox1</i>                       | GTAGCTGCGGTGAAGTAGGC        | CTGCCTGGATTCCGGTATCAT       |                             |                             |
| <i>rps12</i>                      | AGCCAAAGTACGGTTGAGCA        | TTTGGGTTTTTCTGCACCAT        |                             |                             |
| <i>ACT (At1g49240, At3g18780)</i> | GGTAACATTGTGCTCAGTGGTGG     | AACGACCTTAATCTTCATGCTGC     |                             |                             |
| <i>18S (At3g41768)</i>            | AAACGGCTACCACATCCAAG        | ACTCGAAAGAGCCCGTATT         |                             |                             |

**Supplementary Table S3.** Primers used for determining excised intron configurations.

| Intron               | RT Primer               | PCR Primer 1                | PCR Primer 2                 |
|----------------------|-------------------------|-----------------------------|------------------------------|
| <i>rpl2</i> intron   | TTATACCCGCATCTGATCG     | GGGGGCTTCAAGTTCCTTAGG       | GCTCTTTCTAGGTGGGTCCG         |
| <i>rps3</i> intron   | AGCGTTAGAAGAAGTCGTGTC   | GGTACTATCCAGCACGGTTC        | AAAAGACTTACCCATTCGGTGAC      |
| <i>cox2</i> intron   | CACTGTAATAGCTTGCTTCTCG  | AGCAGTACGAGCTGAAAGGC        | CAGAGTGGGGCTCAACAGTC         |
| <i>ccmFc</i> intron  | GTTAAGGAGTCAACTGAGCATCT | GGCCCCGAGCTGTATGAGG         | CCCGGATCGAATCAGAGTT          |
| <i>nad1</i> intron 2 | AACTCAAATGAGCCTTGC      | AGCCACATTCAGGGAAACT         | GGTTGGGTTAGGGGAACATC         |
| <i>nad1</i> intron 3 | CAATAAGACTCGCGCTAGG     | GGGAGCTGTATGAGCGGTAA        | CCCACCCCTAGTTTCAGTCAG        |
| <i>nad1</i> intron 4 | TGCTTACACACAAGGCTACC    | CCGTATGACGCGAGAGTGTC        | GAAGCCCAACGAATGTCAGA         |
| <i>nad2</i> intron 1 | CCGCATTAGGTTAGGGTAG     | TGATCGGTCTGCTAGTTCACG       | GGCTGGGCGATAATAGTTCCT        |
| <i>nad2</i> intron 2 | ATACCCGATCCGATAGTTTACA  | CTTTGTGCGAGCCGTATG          | AGATATTAATTGATATCGGTAGTTGTCC |
| <i>nad2</i> intron 3 | AATCTGAGCGGTACCACC      | GGCGAATTCAAACCTTGTGG        | CCACCCACCCCTACCCCTACC        |
| <i>nad2</i> intron 4 | AACTGCCTTCGGTCCCTC      | CAAGTTGGTGAGCCGTATGA        | CTTATTCGTGGCAACCTTCC         |
| <i>nad4</i> intron 1 | CTTACACACAAGACTACCCCTC  | CCTGAGAAGGGAGTGGCTACC       | TTTACGACGACGGACGACC          |
| <i>nad4</i> intron 2 | CTTTTGTTGCGACATGCT      | ATGATAGGTGGTAACTATCTTGTACGG | GCTAGTAGGTTGATGGGTCCG        |
| <i>nad4</i> intron 3 | CCAAACCAACTGAGGGAAG     | TCTAGCTTGGTTCGGAGAGC        | CCATCGCAAGCACCTACA           |
| <i>nad5</i> intron 1 | CAGATCTATCTACTCGGCAATTC | ACGGTTCGGAGAGCACTG          | GGCAATTCATCCGGTGAC           |
| <i>nad5</i> intron 2 | TTTCTGCTCACTCGTAGGG     | AACCTTAACCGCAAGC            | TCGTGTCGGGTGAGCAA            |
| <i>nad5</i> intron 3 | GCTATCTTTCCCTCTTTATCTC  | GCAGAGTTAGTGAGCCGTGTAA      | GTGAGTCCCATGCGTCAGT          |
| <i>nad5</i> intron 4 | CTTTCCTCGGTTTCGTAG      | CCTGTAAACCCCATGATGT         | CCACGGGTCATAACGCAC           |
| <i>nad7</i> intron 1 | GTAGTAAGGTAGGGCGGTTTC   | ACGGTTTTTAGGGGATCTG         | TGACTTCGCCCCTTAGCC           |
| <i>nad7</i> intron 2 | ACATGCTGTTGTTGTCGTC     | AGTGGGAGAGCCGTGTTATG        | CGAAAGAAACGGAGGACTTCA        |
| <i>nad7</i> intron 3 | AGTAGAGTCAGGCGGAACC     | TGAAGGGAAACTCTCACGTACA      | GGAACCATGTTGCCTGATG          |
| <i>nad7</i> intron 4 | TGCTTTACTCCTAACCCACA    | CGTTAGGTTTGAGAGAGATGG       | ACGGAGCTTAACCTGAGTCTTG       |



**Supplementary Table S4.** Sequences of cloned cRT-PCR products shown in Figure 1C.

| cRT-PCR product |                  | No. of clones                                     |      |       |
|-----------------|------------------|---------------------------------------------------|------|-------|
|                 |                  | +T                                                | -T   |       |
| <b>a</b>        | 5' end           | <b>GGCTTGGATTACTTAGTGTTg</b> cgcgccctaggagggcagcg |      |       |
|                 |                  | AGTGTTg                                           | 2/12 |       |
|                 |                  | cgcgccctaggagggcagcg                              | 9/12 | 13/13 |
|                 |                  | cgcgccctaggagggcagcg                              | 1/12 |       |
|                 | 3' end           | <b>aggttcaaagaaagggtaggccg</b> tcggtttgaatccaata  |      |       |
|                 |                  | aggttcaaagaaagggtaggc                             | 7/12 | 4/13  |
|                 |                  | aggttcaaagaaagggtagg                              | 2/12 | 3/13  |
|                 |                  | aggttcaaagaaagggtag                               |      | 1/13  |
|                 |                  | aggttcaaagaaagggtta                               | 1/12 | 2/13  |
|                 |                  | aggttcaaagaaagggt                                 |      | 1/13  |
|                 | aggttcaaagaaaggg |                                                   | 1/13 |       |
|                 | aggttcaaagaaagg  | 2/12                                              | 1/13 |       |
| <b>u1</b>       | 5' end           | <b>tgagccgaatcactatc</b> attatattatattcattgttg    |      |       |
|                 |                  | tcattatattatattcattgttg                           | 4/4  | 3/3   |
|                 | 3' end           | <b>aggttcaaagaaagggtaggccg</b> tcggtttgaatccaata  |      |       |
|                 |                  | aggttcaaagaaagggtaggc                             | 3/4  | 1/3   |
|                 |                  | aggttcaaagaaagggtagg                              |      |       |
|                 |                  | aggttcaaagaaagggt                                 | 1/4  |       |
|                 | aggttcaaagaaagg  |                                                   | 2/3  |       |

cRT-PCR products are designated a and u1, as in Figure 1. Sequences highlighted in grey are Arabidopsis mtDNA sequences to which we mapped cRT-PCR product ligation sites. Transcript 5' and 3' ends identified from sequencing across ligation sites are displayed underneath, together with the number of clones showing these ends.

For product a, the row labelled 5' end shows the mtDNA sequence at the junction of *nad2* exon 1 (uppercase letters) and intron 1 (lowercase letters). For product u1, the row labelled 5' end corresponds to the mtDNA sequence to which *nad2* mRNA 5' ends have been mapped in previous studies (underlined nucleotides) (43, 58). Rows labelled 3' end display the mtDNA sequence to which *nad2* mRNA 3' ends (underlined nucleotides) have been mapped by Forner et al., 2007 (43).

Product a was analysed for TAP-treated (+T) versus untreated (-T) RNA extracted from *odb1-1* seedlings. Product u1 was analysed for TAP-treated (+T) versus untreated (-T) RNA extracted from wild-type seedlings.

**Supplementary Table S5.** Analysis of excised, reverse-transcribed and cloned mitochondrial introns.

| Intron              |                                                                                  | No. of clones |       |
|---------------------|----------------------------------------------------------------------------------|---------------|-------|
|                     |                                                                                  | +L            | -L    |
| <b><i>rpl2</i></b>  | <p style="text-align: center;"> GGUCAA</p> <p>UGCACAGGGGCUUAGUGUGACCCG</p>       |               |       |
| replicate 1         | TGCACAGGGGCTTTGTGTGACCCG                                                         | 5/9           |       |
|                     | TGCACAGGGGCTTAGGTCAGTGTGACCCG                                                    | 3/9           |       |
|                     | TGCACAGGGGCTTAGGTCACA <sub>6</sub> GTGTGACCCG                                    | 1/9           |       |
| replicate 2         | TGCACAGGGGCTTTGTGTGACCCG                                                         | 8/34          |       |
|                     | TGCACAGGGGCTTAGGTCAGTGTGACCCG                                                    | 21/34         |       |
|                     | TGCACAGGGGCTTAGGTCACA <sub>6</sub> GTGTGACCCG                                    | 5/34          |       |
| <b><i>rps3</i></b>  | <p style="text-align: center;"> CUCUAUU</p> <p>GGGUCACUAUUGAGGGCGACCGCG</p>      |               |       |
| replicate 1         | GGGTCACTATTGTGGGCGACCGCG                                                         | 7/24          | 5/16  |
|                     | GGGTCACTATTTTGGGCGACCGCG                                                         | 6/24          | 1/16  |
|                     | GGGTCACTATTG GGGCGACCGCG                                                         | 5/24          | 1/16  |
|                     | GGGTCACTATT GGGCGACCGCG                                                          | 4/24          | 8/16  |
|                     | GGGTCACTATAATTGGGCGACCGCG                                                        | 1/24          |       |
|                     | GGGTCACTATT T GGGCGACCGCG                                                        |               | 1/16  |
| replicate 2         | GGGTCACTATTG GGGCGACCGCG                                                         |               | 4/13  |
|                     | GGGTCACTATT GGGCGACCGCG                                                          |               | 9/13  |
| replicate 3         | GGGTCACTATTGTGGGCGACCGCG                                                         | 4/11          | 10/12 |
|                     | GGGTCACTATTGAGGGCGACCGCG                                                         | 1/11          |       |
|                     | GGGTCACTATTG GGGCGACCGCG                                                         | 5/11          | 1/12  |
|                     | GGGTCACTATT GGGCGACCGCG                                                          | 1/11          | 1/12  |
| <b><i>ccmFc</i></b> | <p style="text-align: center;"> GGUCAACU</p> <p>AGUAAUGGUGCGGCUUAGTGCACCCGGC</p> |               |       |
| replicate 1         | AGTAATG* GTGCGACCCGGC                                                            | 15/15         | 7/7   |
| replicate 2         | AGTAATGGTGCGGCTTTGTGCGACCCGGC                                                    | 2/13          | 2/16  |
|                     | AGTAATG* GTGCGACCCGGC                                                            | 11/13         | 14/16 |
| replicate 3         | AGTAATGGTGCGGCTT GTGCGACCCGGC                                                    | 2/27          |       |
|                     | AGTAATGGT GTGCGACCCGGC                                                           | 1             |       |
|                     | AGTAATG* GTGCGACCCGGC                                                            | 24/27         | 30/30 |
|                     | *products potentially deriving from RT-PCR artifacts or incorrect splicing       |               |       |
| <b><i>cox2</i></b>  | <p style="text-align: center;"> CCCCUA</p> <p>CCAAAGAAAGCUGAGCGCCCGGAA</p>       |               |       |
| replicate 1         | CCAAAGAAAGCTGTGCGCCCGGAA                                                         | 24/24         | 16/16 |

Supplementary Table S5 – continued.

| Intron                       |                                                           | No. of clones |       |
|------------------------------|-----------------------------------------------------------|---------------|-------|
|                              |                                                           | +L            | -L    |
| <b><i>nad1i2</i></b>         | <b>GGGGACACCCCGGUAUGUGCGCCUUG</b>                         |               |       |
| replicate 1<br>Col-0         | GGGGACACCCCGGTATGTGCGCCTTG                                | 14/25         |       |
|                              | GGGGACACCCCGGTATA <sub>10-12</sub> GTGCGCCTTG             | 6/25          |       |
|                              | GGGGACACCCCGGTATA <sub>7</sub> CGTGTGCGCCTTG              | 2/25          |       |
|                              | GGGGACACCCCGGTATAATAAGTGTGCGCCTTG                         | 3/25          |       |
|                              |                                                           |               |       |
| replicate 2<br>Col-0         | GGGGACACCCCGGTATGTGCGCCTTG                                | 6/15          |       |
|                              | GGGGACACCCCGGTATA <sub>3-7</sub> GTGCGCCTTG               | 2/15          |       |
|                              | GGGGACACCCCGGTATA <sub>5</sub> CGTGTGCGCCTTG              | 1/15          |       |
|                              | GGGGACACCC GTGCGCCTTG                                     | 4/15          |       |
|                              | GGGGACAC GTGCGCCTTG                                       | 1/15          |       |
|                              | GGGAAA GTGCGCCTTG                                         | 1/15          |       |
|                              |                                                           |               |       |
| replicate 3<br>Col-0         | GGGGACACCCCGGTATGTGCGCCTTG                                | 17/32         | 14/14 |
|                              | GGGGACACCCCGGTATA <sub>1-6</sub> GTGCGCCTTG               | 3/32          |       |
|                              | GGGGACACCCCGGTATA <sub>5</sub> CGTGTGCGCCTTG              | 1/32          |       |
|                              | GGGGACACCCCGGTATA <sub>9</sub> CA <sub>5</sub> GTGCGCCTTG | 1/32          |       |
|                              | GGGGACACCC GTGCGCCTTG                                     | 6/32          |       |
|                              | GGGGACACCC GTGCGCCTTG                                     | 4/32          |       |
|                              |                                                           |               |       |
| replicate 4<br>Col-0         | GGGGACACCCCGGTATGTGCGCCTTG                                | 17/37         | 7/17  |
|                              | GGGGACACCCAGGTATGTGCGCCTTG                                |               | 1/17  |
|                              | GGGGACACCCCGGTATA <sub>3-9</sub> GTGCGCCTTG               | 4/37          |       |
|                              | GGGGACACCCCGGTATA <sub>3</sub> CGTGTGCGCCTTG              | 1/37          |       |
|                              | GGGGACACCCCGGTATA <sub>4</sub> CA <sub>4</sub> GTGCGCCTTG | 1/37          |       |
|                              | GGGGACACCC GTGCGCCTTG                                     | 6/37          |       |
|                              | GGGGACACCTC GTGCGCCTTG                                    | 1/37          |       |
|                              | GGGGACACCC GTGCGCCTTG                                     | 7/37          |       |
|                              | GGG GTGCGCCTTG                                            |               | 1/17  |
|                              | GG GTGCGCCTTG                                             |               | 8/17  |
|                              |                                                           |               |       |
| replicate 1<br><i>odb1-1</i> | GGGGACACCCCGGTATGTGCGCCTTG                                | 12/32         | 35/35 |
|                              | GGGGACACCCCGGTGTGTGCGCCTTG                                | 1/32          |       |
|                              | GGGGACACCCCGGTATA <sub>3-17</sub> GTGCGCCTTG              | 7/32          |       |
|                              | GGGGACACCCCGGTATA <sub>6</sub> CA <sub>5</sub> GTGCGCCTTG | 1/32          |       |
|                              | GGGGACACCC GTGCGCCTTG                                     | 5/32          |       |
|                              | GGGGACACCC GTGCGCCTTG                                     | 6/32          |       |

Supplementary Table S5 – continued.

| Intron               |                                                                                                                                                                                                            | No. of clones |       |
|----------------------|------------------------------------------------------------------------------------------------------------------------------------------------------------------------------------------------------------|---------------|-------|
|                      |                                                                                                                                                                                                            | +L            | -L    |
| <b><i>nad1i3</i></b> | <p style="text-align: center;"> CUCUCG</p> <p>CUUGUUGUACCUUAGCGCGGGAUG</p>                                                                                                                                 |               |       |
| replicate 1          | CTTGTTGTACCTTTGCGCGGGATG                                                                                                                                                                                   | 18/23         | 11/16 |
|                      | CTTGTTGTACCCTTGCGCGGGATG                                                                                                                                                                                   | 1/23          |       |
|                      | CTTGTTGTACCTT GCGCGGGATG                                                                                                                                                                                   | 4/23          | 2/16  |
|                      | CTTGTTGTACCCTCGCGCGGGATG                                                                                                                                                                                   |               | 1/16  |
|                      | CTTGTTGTACCTTACTCTCGGCGCGGGATG                                                                                                                                                                             |               | 2/16  |
|                      |                                                                                                                                                                                                            |               |       |
| replicate 2          | CTTGTTGTACCTTTGCGCGGGATG                                                                                                                                                                                   |               | 10/17 |
|                      | CTTGTTGTACCTT GCGCGGGATG                                                                                                                                                                                   |               | 1/17  |
|                      | CTTGTTGTACCCTCGCGCGGGATG                                                                                                                                                                                   |               | 1/17  |
|                      | CTTGTTGTACC GCGCGGGATG                                                                                                                                                                                     |               | 1/17  |
|                      | CTTGTTGTACCCTCGGCGCGGGATG                                                                                                                                                                                  | 1/15          |       |
|                      | CTTGTTGTACCTTACTCTCGGCGCGGGATG                                                                                                                                                                             | 15/16         | 4/17  |
|                      |                                                                                                                                                                                                            |               |       |
| <b><i>nad1i4</i></b> | <p style="text-align: center;"> CUCACC</p> <p>GAGCUGCAUCCUUGUGCGGAACU</p>                                                                                                                                  |               |       |
| replicate 1          | GAGCTGCATCCTTTGTGCGGAACT                                                                                                                                                                                   | 10/12         | 13/19 |
|                      | GAGCTGCATCCTT GTGCGGAACT                                                                                                                                                                                   |               | 1/19  |
|                      | GAGCGGTCCAC GTGCGGAACT                                                                                                                                                                                     |               | 1/19  |
|                      | AGGCCCGACGA GTGCGGAACT                                                                                                                                                                                     |               | 1/19  |
|                      | CCCTACTCACC GTGCGGAACT                                                                                                                                                                                     | 2/12          | 1/19  |
|                      | GTTTCTTTGAG GTGCGGAACT                                                                                                                                                                                     |               | 1/19  |
|                      | GAGCTGCATCCTTAAAGTGTGCGGAACT                                                                                                                                                                               |               | 1/19  |
|                      | Several additional products were detected in the -L sample in which the joined 5' and 3' ends were incorrect by a few nucleotides at 5' and ~30 nt at 3' end; these might derive from mis-splicing events. |               |       |
|                      |                                                                                                                                                                                                            |               |       |
| replicate 2          | GAGCTGCATCCTTTGTGCGGAACT                                                                                                                                                                                   | 7/9           | 4/6   |
|                      | GAGCTGCATCCTT GTGCGGAACT                                                                                                                                                                                   | 2/9           |       |
|                      | GAGCTGCACCCTTCTGTGCGGAACT                                                                                                                                                                                  |               | 1/6   |
|                      | GAGCTGCATCCTTACTCACCTGGTGTGCGGAACT                                                                                                                                                                         |               | 1/6   |

Supplementary Table S5 – continued.

| Intron                       |                                                                   | No. of clones |      |       |
|------------------------------|-------------------------------------------------------------------|---------------|------|-------|
|                              |                                                                   | +L            | -L   |       |
| <i>nad2i1</i>                | TCTGGCCGGGCUUUCUGAGGUAUGCGCGCCUAG                                 |               |      |       |
| replicate 1<br>Col-0         | TCTGGCCGGGCTTTCCTGAGGTATGCGCGCCTAG                                | 14/20         |      |       |
|                              | TCTGGCCGGGCTTTCCTGAGGTATA <sub>5</sub> CGCGCGCCTAG                | 1/20          |      |       |
|                              | TCTGGCCGGGCTTTCCTGAGGTATA <sub>5</sub> CACGCGCGCCTAG              | 1/20          |      |       |
|                              | TCTGGCCGGGCT                                                      | GCGCGCCTAG    |      | 11/14 |
|                              | TCTGGCCGG                                                         | GCGCGCCTAG    | 3/20 | 3/14  |
|                              | TCTG                                                              | GCGCGCCTAG    | 1/20 |       |
| replicate 2<br>Col-0         | TCTGGCCGGGCTTTCCTGAGGTATGCGCGCCTAG                                | 17/31         |      |       |
|                              | TCTGGCCGGGCTTTCCTGAGGTAT CGCGCCTAG                                | 3/31          |      |       |
|                              | TCTGGCCGGGCTTTCCTGAGGT GCGCGCCTAG                                 | 1/31          |      |       |
|                              | TCTGGCCGGGCTTTCCT                                                 | GCGCGCCTAG    | 3/31 |       |
|                              | TCTGGCCGGGCTTTC                                                   | GCGCGCCTAG    | 1/31 |       |
|                              | TCTGGCCGGGCTTT                                                    | GCGCGCCTAG    | 1/31 |       |
|                              | TCTGGCCGGGCT                                                      | GCGCGCCTAG    | 1/31 |       |
|                              | TCTGGCCGGG                                                        | GCGCGCCTAG    | 2/31 | 1/26  |
|                              | TCTGGCCGG                                                         | GCGCGCCTAG    | 1/31 | 23/26 |
|                              | TCTGGCCGGA                                                        | CGCGCCTAG     |      | 1/26  |
|                              | TCTGGCCG                                                          | GCGCGCCTAG    |      | 1/26  |
|                              | TCTGGCC                                                           | GCGCGCCTAG    | 1/31 |       |
| replicate 3<br>Col-0         | TCTGGCCGGGCTTTCCTGAGGTATGCGCGCCTAG                                | 8/19          |      |       |
|                              | TCTGGCCGGGCTTTCCTGAGGTATA <sub>1-15</sub> GCGCGCCTAG              | 10/19         |      |       |
|                              | TCTGGCCGG                                                         | GCGCGCCTAG    | 1/19 | 6/7   |
|                              | TCTGGCC                                                           | GCGCGCCTAG    |      | 1/7   |
| replicate 1<br><i>odb1-1</i> | TCTGGCCGGGCTTTCCTGAGGTATGCGCGCCTAG                                | 12/23         |      |       |
|                              | TCTGGCCGGGCTTTCCTGAGGTAT <sub>T</sub> GCGCGCCTAG                  | 2/23          |      |       |
|                              | TCTGGCCGGGCTTTCCTG GCGCGCCTAG                                     |               | 1/24 |       |
|                              | TCTGGCCGGGCTTT                                                    | GCGCGCCTAG    | 1/23 |       |
|                              | TCTGGCCGGGCTT                                                     | GCGCGCCTAG    |      | 1/24  |
|                              | TCTGGCCGGG                                                        | GCGCGCCTAG    | 2/23 | 3/24  |
|                              | TCTGGCCGG                                                         | GCGCGCCTAG    | 2/23 | 13/24 |
|                              | TCTGGCC                                                           | GCGCGCCTAG    | 4/23 |       |
| TCTGG                        | GCGCGCCTAG                                                        |               | 6/24 |       |
| replicate 2<br><i>odb1-1</i> | TCTGGCCGGGCTTTCCTGAGGTATGCGCGCCTAG                                | 6/19          | 2/4  |       |
|                              | TCTGGCCGGGCTTTCCTGAGGTATA <sub>2-4</sub> GCGCGCCTAG               | 3/19          |      |       |
|                              | TCTGGCCGGGCTTTCCTGAGGTATA <sub>3</sub> TA <sub>5</sub> GCGCGCCTAG | 1/19          |      |       |
|                              | TCTGGCCGGGCTTTCCTGAGGTA GCGCGCCTAG                                | 1/19          |      |       |
|                              | TCTGGCCGGGCTTTCCTGAGGTA <sub>A3-8</sub> GCGCGCCTAG                | 5/19          |      |       |
|                              | TCTGGCCGGGCTTTCCTGAGGTA <sub>A3</sub> CGCGCGCCTAG                 | 1/19          |      |       |
|                              | TCTGGCCGGGCTTTCCTGAGGTA <sub>A7</sub> CA <sub>4</sub> GCGCGCCTAG  | 1/19          |      |       |
|                              | TCTGGCCGGGCTTT                                                    | GCGCGCCTAG    | 1/19 |       |
|                              | TCTGGCCGGG                                                        | GCGCGCCTAG    |      | 1/4   |
|                              | TCT                                                               | GCGCGCCTAG    |      | 1/4   |

Supplementary Table S5 – continued.

| Intron               |                                                                             | No. of clones |       |
|----------------------|-----------------------------------------------------------------------------|---------------|-------|
|                      |                                                                             | +L            | -L    |
| <b><i>nad2i2</i></b> | <p style="text-align: center;">  CCCUAU</p> <p>GUUGGGCCUACCCAGUACGACCGG</p> |               |       |
| replicate 1          | GTTGGGCCTACCCGTGACGACCGG                                                    | 13/15         | 13/13 |
|                      | GTTGGGCCTACCC GTACGACCGG                                                    | 1/15          |       |
|                      | GTTGGGCCTACCCCGTACGACCGG                                                    | 1/15          |       |
| <b><i>nad2i3</i></b> | <p style="text-align: center;">  CUCUAU</p> <p>CAUAUUCCCUUUGAGGGCGGCUGU</p> |               |       |
| replicate 1          | CATATTCCTTTGTGGGCGGCTGT                                                     | 7/22          | 12/23 |
|                      | CATATTCCTTTGAGGGCGGCTGT                                                     | 1/22          |       |
|                      | CATATTCCTTT GGGCGGCTGT                                                      | 1/22          | 1/23  |
|                      | CATATTCCTTTT GGGCGGCTGT                                                     | 6/22          | 3/23  |
|                      | CATATTCCTTTTGTGGGCGGCTGT                                                    | 1/22          | 2/23  |
|                      | CATATTCCTTTTGTGGGCGGCTGT                                                    |               | 1/23  |
|                      | CATATTCCTTTATGGGCGGCTGT                                                     | 1/22          |       |
|                      | CATATTCCTTTG GGGCGGCTGT                                                     | 4/22          | 2/23  |
|                      | CATATTCCTTTTGGGGCGGCTGT                                                     |               | 1/23  |
|                      | CATATTCCTTTTGTGGGCGGCTGT                                                    |               | 1/23  |
|                      | CATATTCCTTTGCGGGCGGCTGT                                                     | 1/22          |       |
| <b><i>nad2i4</i></b> | <p style="text-align: center;">  CUCUA</p> <p>UGGACCCUUUUUCAGGGCGGCCGG</p>  |               |       |
| replicate 1          | TGGACCCTTTTTCTGGGCGGCCGG                                                    | 21/23         | 20/21 |
|                      | TGGACCCTTTT CTGGGCGGCCGG                                                    | 1/23          |       |
|                      | TGGACCCTTTTT TGGGCGGCCGG                                                    | 1/23          |       |
|                      | TGGACCCTTTTTCCGGGCGGCCGG                                                    |               | 1/21  |
| <b><i>nad4i1</i></b> | <p style="text-align: center;">  CUCUAC</p> <p>GGGGCCACCCCUUAGUGCGGAGCG</p> |               |       |
| replicate 1          | GGGGCCACCCCTTTGTGCGGAGCG                                                    | 9/13          | 13/14 |
|                      | GGGGCCACCCCT TGTGCGGAGCG                                                    | 2/13          |       |
|                      | GGGGCCACCACTTAGTGCGGAGCG                                                    | 1/13          | 1/14  |
|                      | GGGGCCACCCCTTACTCTACGTGCGGAGCG                                              | 1/13          |       |
| replicate 2          | GGGGCCACCCCTTTGTGCGGAGCG                                                    | 12/20         | 13/13 |
|                      | GGGGCCACCCCTTACTCTACA <sub>3-7</sub> GTGCGGAGCG                             | 7/20          |       |
|                      | GGGGCCACCCCTTACTCTACA <sub>5</sub> CA <sub>6</sub> GTGCGGAGCG               | 1/20          |       |

Supplementary Table S5 – continued.

| Intron                           |                                                                               | No. of clones |      |
|----------------------------------|-------------------------------------------------------------------------------|---------------|------|
|                                  |                                                                               | +L            | -L   |
| <b><i>nad4i2</i></b>             | <b>GGAGAAATCTTTTCGCTCTATGGGCGGCGGCCGTT</b>                                    |               |      |
| replicate 1                      | GGAGAAATCTTTTCGCTCTATA <sub>3-14</sub> GGGCGGCGGCCGTT                         | 7/22          |      |
|                                  | GGAGAAATCTTTTCGCTCTATA <sub>8</sub> GA <sub>5</sub> GGGCGGCGGCCGTT            | 1/22          |      |
|                                  | GGAGAAATCTTTTCGCTCTATA <sub>9</sub> TA <sub>7</sub> GGGCGGCGGCCGTT            | 1/22          |      |
|                                  | GGAGAAATCTTTTCGCTCTATA <sub>8</sub> CGGGCGGCGGCCGTT                           | 2/22          |      |
|                                  | GGAGAA GGGCGGCGGCCGTT                                                         | 11/22         |      |
| replicate 2                      | GGAGAAATCTTTTCGCTCTA GGGCGGCGGCCGTT                                           | 2/12          |      |
|                                  | GGAGAAATCTTTTCGCT GGGCGGCGGCCGTT                                              | 1/12          |      |
|                                  | GGAGAAA <sub>4</sub> GGGCGGCGGCCGTT                                           | 4/12          |      |
|                                  | GGAGAAA GGGCGGCGGCCGTT                                                        | 1/12          |      |
|                                  | GGAGA GGGCGGCGGCCGTT                                                          | 3/12          |      |
|                                  | GG GGGCGGCGGCCGTT                                                             | 1/12          |      |
|                                  | GTTTCGGGGGGT GGGCGGCGGCCGTT                                                   |               | 1/11 |
|                                  | GTTTCGGGGGGTAA GGGCGGCGGCCGTT                                                 |               | 5/11 |
| GTTTCGGGGGGTAATCG GGGCGGCGGCCGTT |                                                                               | 5/11          |      |
| replicate 3                      | GGAGAAATCTTTTCGCTCTATGGGCGGCGGCCGTT                                           | 3             |      |
|                                  | GGAGAAATCTTTTCGCTCTATA <sub>3-8</sub> GGGCGGCGGCCGTT                          | 1             |      |
|                                  | GGAGAAATCTTTA <sub>4</sub> T GGGCGGCGGCCGTT                                   | 3             |      |
|                                  | GGA <sub>2</sub> GGGCGGCGGCCGTT                                               | 6             |      |
|                                  | G GGGCGGCGGCCGTT                                                              | 1             |      |
| <b><i>nad4i3</i></b>             | <b>UGCUGAACUAUUGA</b> <span style="color:blue"> CUCUA</span> <b>GGGCGACCG</b> |               |      |
| replicate 1                      | TGCTGAACTATTGTGGGCGACCG                                                       | 9/14          | 9/16 |
|                                  | TGCTGAACTATTG GGGCGACCG                                                       | 4/14          |      |
|                                  | TGCTGAACTATT GGGCGACCG                                                        | 1/14          | 3/16 |
|                                  | TGCTGAACTATATTGGGCGACCG                                                       |               | 2/16 |
|                                  | TGCTGAACTATTGGGCGACCG                                                         |               | 1/16 |
|                                  | TGCTGAACTATT TGGGCGACCG                                                       |               | 1/16 |

Supplementary Table S5 – continued.

| Intron               |                                                                             | No. of clones |       |
|----------------------|-----------------------------------------------------------------------------|---------------|-------|
|                      |                                                                             | +L            | -L    |
| <b><i>nad5i1</i></b> | <p style="text-align: center;"> CUCUGU</p> <p>UAAUUCACUUUUGAGGCGACCGUG</p>  |               |       |
| replicate 1          | TAATTCACTTTTGTGGCGACCGTG                                                    | 10/14         | 8/15  |
|                      | TAATTCACTTCTGTGGCGACCGTG                                                    | 1/14          | 3/15  |
|                      | TAATTCACTTTTGTGGCGACCGTG                                                    | 1/14          | 1/15  |
|                      | TAATTCACTTTCTGGCGACCGTG                                                     |               | 1/15  |
|                      | TAATTCACTTTTGTGGCGACCGTG                                                    | 1/14          |       |
|                      | TAATTCACTTTTGTGGCGACCGTG                                                    | 1/14          | 2/15  |
|                      |                                                                             |               |       |
| <b><i>nad5i2</i></b> | <p style="text-align: center;"> GGGACC</p> <p>AGCAAUGGGGCUUAGUGUGACCCG</p>  |               |       |
| replicate 1          | AGCAATGGGGCTTTGTGTGACCCG                                                    | 15/15         | 28/30 |
|                      | AGCAATGGGGCT TGTGTGACCCG                                                    |               | 2/30  |
|                      |                                                                             |               |       |
| <b><i>nad5i3</i></b> | <p style="text-align: center;"> CCCCUAU</p> <p>CGACUGCGUCUUGAGGGCGGCCGG</p> |               |       |
| replicate 1          | CGACTGCGTCTTGTGGGCGGCCGG                                                    | 3/22          | 5/14  |
|                      | CGACTGCGTCTTGAGGGGCGGCCGG                                                   |               | 3/14  |
|                      | CGACTGCGTCTT GGGCGGCCGG                                                     | 19/22         | 6/14  |
|                      |                                                                             |               |       |
| replicate 2          | CGACTGCGTCTTGTGGGCGGCCGG                                                    | 7/21          | 7/21  |
|                      | CGACTGCGTCTTG GGGCGGCCGG                                                    | 1/21          | 2/21  |
|                      | CGACTGCGTCTT GGGCGGCCGG                                                     | 13/21         | 12/21 |
|                      |                                                                             |               |       |
| <b><i>nad5i4</i></b> | <p style="text-align: center;"> CCCUAC</p> <p>CGGGGAUAUCCCGAGUGCGAAGAG</p>  |               |       |
| replicate 1          | CGGGGATATCCCGTGTGCGAAGAG                                                    |               | 9/15  |
|                      | CGGGGATATCCCG GTGCGAAGAG                                                    |               | 3/15  |
|                      | CGGGGATATCCC AGTGC GAAGAG                                                   |               | 1/15  |
|                      | CGGGGATATCCCGAGTGC GAAGAG                                                   |               | 1/15  |
|                      | CGGGGATATCCCAGTGC GAAGAG                                                    |               | 1/15  |
|                      |                                                                             |               |       |
| replicate 2          | CGGGGATATCCCGTGTGCGAAGAG                                                    |               | 12/12 |



Supplementary Table S5 – continued.

| Intron               |                                                                                   | No. of clones |       |
|----------------------|-----------------------------------------------------------------------------------|---------------|-------|
|                      |                                                                                   | +L            | -L    |
| <b><i>nad7i1</i></b> | CCGGCCGGCGCCCACCCGACGUGCGGCACG                                                    |               |       |
| replicate 1          | CCGGCCGGCGCCCACCCGACA <sub>7-16</sub> GTGCGGCACG                                  | 12/14         |       |
|                      | CCGGCCGGCGCCCACCCGACA <sub>5</sub> C GTGCGGCACG                                   | 1/14          |       |
|                      | CCGGCCGGCGCCCACCCGACA <sub>2-16</sub> CA <sub>2-6</sub> GTGCGGCACG                | 1/14          |       |
| replicate 2          | CCGGCCGGCGCCCACCCGACA <sub>7-16</sub> GTGCGGCACG                                  | 8/15          |       |
|                      | CCGGCCGGCGCCCACCCGACA <sub>4</sub> C GTGCGGCACG                                   | 1/15          |       |
|                      | CCGGCCGGCGCCCACCCGACA <sub>2-16</sub> CA <sub>3-6</sub> GTGCGGCACG                | 6/15          |       |
| replicate 3          | CCGGCCGGCGCCCACCCGACA <sub>7-16</sub> GTGCGGCACG                                  | 17/35         |       |
|                      | CCGGCCGGCGCCCACCCGACA <sub>3</sub> CACA <sub>2</sub> CA <sub>8</sub> GTGCGGCACG   | 1/35          |       |
|                      | CCGGCCGGCGCCCACCCGACA <sub>7</sub> CA <sub>5</sub> TA <sub>10-11</sub> GTGCGGCACG | 2/35          |       |
|                      | CCGGCCGGCGCCCACCCGACA <sub>13</sub> TA <sub>10-11</sub> GTGCGGCACG                | 2/35          |       |
|                      | CCGGCCGGCGCCCACCCGACA <sub>9</sub> GA <sub>5</sub> GTGCGGCACG                     | 1/35          |       |
|                      | CCGGC                                                                             | 12/35         |       |
|                      | GGCCGAAAG                                                                         |               | 16/16 |
| <b><i>nad7i2</i></b> | <p style="text-align: center;"> CCCUAU</p> CGUUCGUGUUUUGAGGGCGAUCGC               |               |       |
| replicate 1          | CGTTCCGTTTTTGTGGGCGATCGC                                                          | 7/16          | 7/14  |
|                      | CGTTCCGTTTTTTT GGGCGATCGC                                                         | 5/16          | 2/14  |
|                      | CGTTCCGTTTTTGT GGGCGATCGC                                                         | 4/16          | 5/14  |
| <b><i>nad7i3</i></b> | <p style="text-align: center;"> UCCCAAC</p> GGUGGGCCUACCCAGUGCGACAUG              |               |       |
| replicate 1          | GGTGGGCCTACCCGTGTGCGACATG                                                         | 12/13         | 16/16 |
|                      | GGTGGGCCTACCC GTGCGACATG                                                          | 1/13          |       |
| <b><i>nad7i4</i></b> | <p style="text-align: center;"> CUCUAC</p> GGAUCAUCGGUCUAGUGCGUCGUG               |               |       |
| replicate 1          | GGATCATCGGTCTTGTGCGTCGTG                                                          | 15/15         | 15/16 |
|                      | GGATCATCGGTCT GTGCGTCGTG                                                          |               | 1/16  |

Introns are designated as in Figure 4. Rows highlighted in grey show sequences at branch point regions for every analysed mitochondrial intron, with the intron 5' end printed in grey, the predicted branch point ("bulged A") in green, the intron 3' sequence upstream of the predicted branch points in black and the predicted lariat tail in blue. Orange nucleotides mark positions that undergo C-to-U editing. Below each branch point model, sequences obtained from cRT-PCR/RT-PCR experiments are shown. For the majority of introns, several independent experiments were performed. The number of clones identified for every sequence is indicated in columns +L (ligase-treated RNA samples) and -L (untreated samples). Black, grey, green and blue nucleotides in these sequences are as in branch point region models. As previously described (45), sequences of lariat-derived cDNAs show a thymidine instead of adenosine at the branch point. Red letters denote non-encoded nucleotides identified in cRT-PCR and RT-PCR products.

Clones showing the complete intron 3' sequence correspond to introns spliced via a hydrolytic pathway (e.g., *nad1* intron 2) whereas clones lacking the lariat tail nucleotides correspond to introns using the lariat pathway (e.g., *cox2* intron). Sequences including the lariat tail but derived from introns that do not require ligation prior to amplification correspond to introns released via first-step hydrolysis

in a circular form. Thus, both linear and circular forms of excised *nad2* intron 1 were detected. The stretches of non-encoded A and C nucleotides seen in ligase-dependent sequences have been proposed to be added to excised linear introns in order to tag these molecules for the bacterial-type RNA degradation pathway (33).

For several introns, a number of products were obtained with intron 3' sequences that were truncated and shorter than expected for a lariat or hydrolytic pathway; these products could be due to either mis-splicing or RT-PCR artifacts. The corresponding intron molecules are unlikely to have been released as lariats as no mis-reading of the potential alternative branch point nucleotide is seen. All experiments were done on wild-type (Col-0) RNA except experiments for *nad1* intron 2 and *nad2* intron 1, which were additionally performed on RNA extracted from *odb1-1*.
